# Supplementary material for: Hydrophobic coating- and surface active solvent-mediated self-assembly of charged gold and silver nanoparticles at water–air and water–oil interfaces
Source: Royal Society of Chemistry journal article supplement (doi:10.1039/b820970g), 2009-01-01
Supplement: b820970g.pdf [file b820970g.pdf]

Supplementary material for:

***Hydrophobic coating- and surface active solvent-mediated self-assembly of charged gold and silver nanoparticles at water-air and water-oil interfaces***

Lijun Xu,<sup>a</sup> Guobin Han,<sup>b</sup> Jiawen Hu,<sup>\*a</sup> Yan He,<sup>a</sup> Jiangao Pan,<sup>a</sup> Yongjun Li,<sup>\*a</sup> and Jiannan

Xiang<sup>a</sup>

a. State Key Laboratory for Chemo/Biosensing and Chemometrics, Biomedical Engineering Center, and College of Chemistry and Chemical Engineering, Hunan University, Changsha 410082, China

b. State Key Laboratory for Physical Chemistry of Solid Surfaces and Department of Chemistry, Xiamen University, Xiamen 361005, China

\* Corresponding author: Dr. Jiawen Hu, Fax: +86-0731-8821740 E-mail: [jwhu@hnu.cn](mailto:jwhu@hnu.cn)

Dr. Yongjun Li, Fax: +86-0731-8821904 E-mail: [liyje@hnu.cn](mailto:liyje@hnu.cn)

## S1. Scheme for Preparation and Transfer of the Nanoparticle Films Formed at the Water-Air or Water-Oil Interface

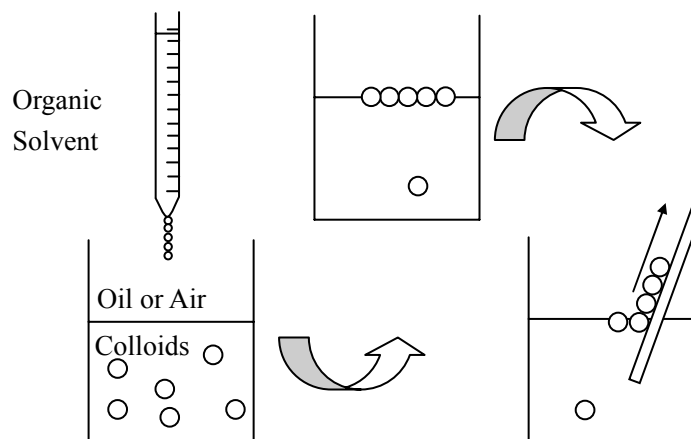

## S2. Contact Angle Measurements on Vacuum-Evaporated Au Films.

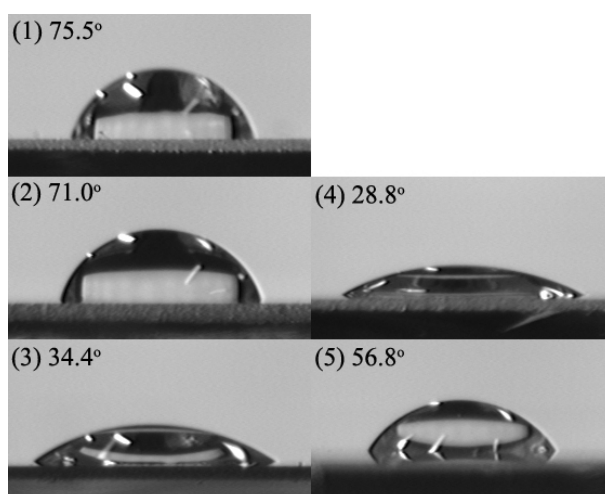

Figure S1. Photographs of 5  $\mu\text{L}$  water drops on vacuum-evaporated Au films without (1) and with 28.6 volume % of methanol (2), ethanol (3), 2-propanol (4), and acetone (5), respectively.

## S3. Correction of Zeta Potentials

Zeta potentials were calculated from the measured electrophoretic mobilities using the Smoluchowski equation

$$\mu = \frac{\epsilon_r \epsilon_0}{\eta} \zeta$$

where  $\mu$  is electrophoretic mobility,  $\eta$  is medium viscosity,  $\varepsilon_r$  is medium dielectric constant,  $\varepsilon_0$  is vacuum permittivity, and  $\zeta$  is zeta potential.

Because the zeta potential analyzer contains only the parameters of pure media, a series of zeta potentials  $\zeta_1$  were first obtained by using the dielectric constant  $\varepsilon_{r,1}$  and the viscosity  $\eta_1$  of pure water with increase of the proportion of organic solvent.

$$\zeta_1 = \mu_1 \frac{\eta_1}{\varepsilon_{r,1} \varepsilon_0}$$

Then, the zeta potentials were corrected for the change in the dielectric constant and the viscosity with addition of organic solvent to water to obtain the real zeta potentials  $\zeta_2$  of the colloidal particles dispersed in an organic solvent-water binary medium.

$$\zeta_2 = \frac{\varepsilon_{r,1} \eta_2}{\varepsilon_{r,2} \eta_1} \zeta_1$$

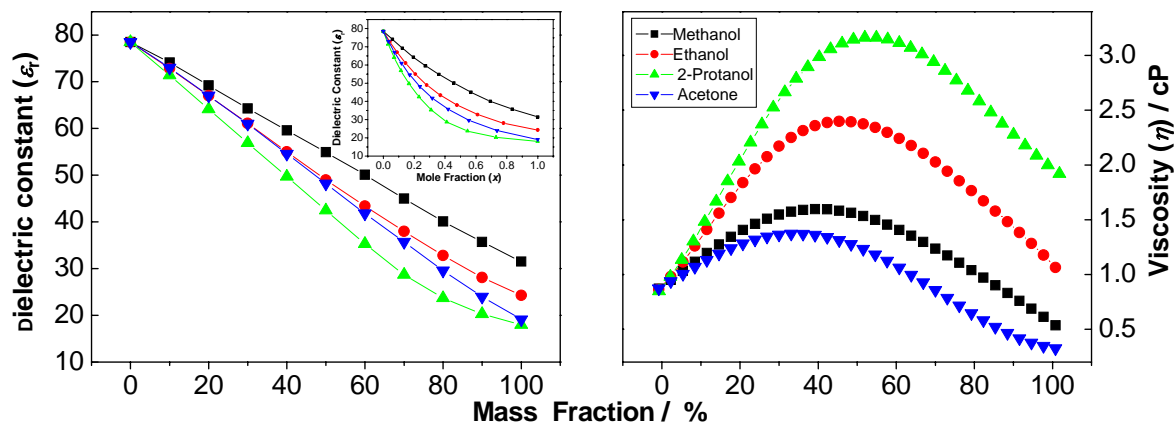

Figure S2. Dielectric constant (left panel) and viscosity (right panel) of organic solvent-water mixtures as a function of the mass fraction of the organic solvent at 25°C. The insert in the left panel shows the dielectric constant of the organic solvent-water mixtures as a function of the mole ratio of the organic solvent at 25°C. Dielectric constant data used to fit the curves in the left panel were taken from *J. Am. Chem. Soc.*, 1932, **54**, 4126 and viscosity data used to fit the curves in the right panel were measured using an Ubbelohde Viscometer.

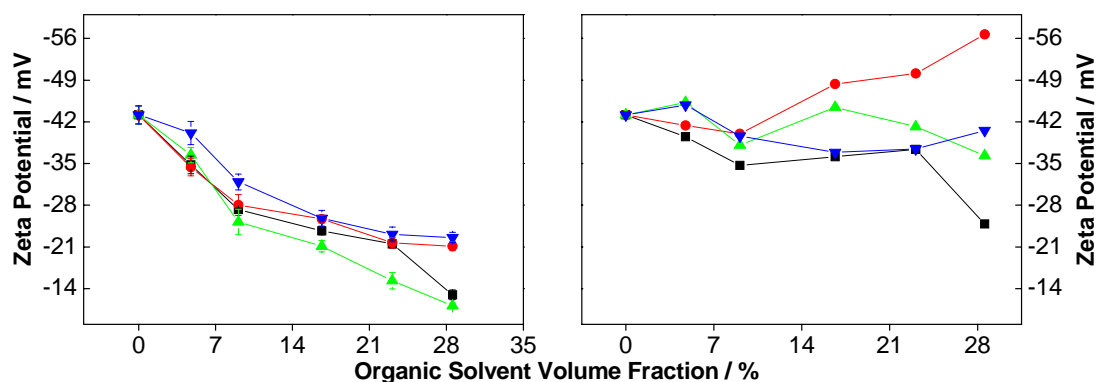

Figure S3. Left panel shows the  $\zeta$  potentials of 40 nm gold colloids in organic solvent-water mixtures of methanol (■), ethanol (●), 2-propanol (▲), and acetone (▼). These  $\zeta$  potentials were converted from the measured electrophoretic mobilities by using the dielectric constant and viscosity of pure water. The corresponding corrected  $\zeta$  potentials considering the change in dielectric constant and viscosity with addition of organic solvent to water are shown in the right panel.

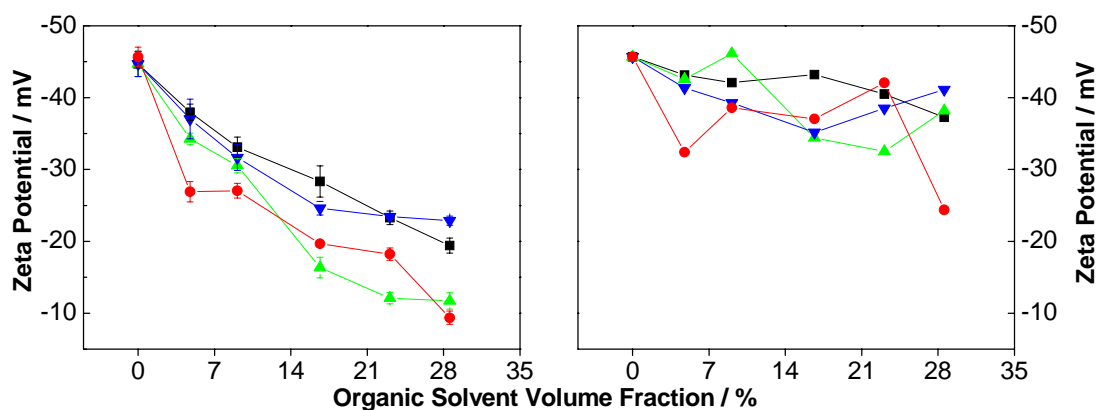

Figure S4. The left panel shows the  $\zeta$  potentials of Ag colloids in organic solvent-water mixtures of methanol (■), ethanol (●), 2-propanol (▲), and acetone (▼), respectively. These  $\zeta$  potentials were converted from the measured electrophoretic mobilities by using the dielectric constant and viscosity of pure water. The corresponding corrected  $\zeta$  potentials considering the change in dielectric constant and viscosity with addition of organic solvent to water are shown in the right panel.
